# Supplementary material for: Towards the Small and the Beautiful: A Small Dibromotyrosine Derivative from Pseudoceratina sp. Sponge Exhibits Potent Apoptotic Effect through Targeting IKK/NFκB Signaling Pathway
Source: MDPI journal article supplement (doi:10.3390/md11093168), 2013-08-26
Supplement: s2 [file s2]

marinedrugs-11-03168-s001.mol
  corina  12171321363D 1   1.00000     0.00000 
CORINA 3.49 0023  12.04.2013
 14 14  0  0  0  0  0  0  0  0999 V2000
   -0.0187    1.5312    0.0105 C   0  0  0  0  0  0  0  0  0  0  0  0
    0.0021   -0.0041    0.0020 C   0  0  0  0  0  0  0  0  0  0  0  0
    0.6749   -0.4861   -1.2823 C   0  0  0  0  0  0  0  0  0  0  0  0
    2.0179    0.1563   -1.4642 C   0  0  0  0  0  0  0  0  0  0  0  0
    2.3620    1.2989   -0.8815 C   0  0  0  0  0  0  0  0  0  0  0  0
    1.4214    2.0011   -0.0008 C   0  0  0  0  0  0  0  0  0  0  0  0
    1.7846    2.9267    0.6944 O   0  0  0  0  0  0  0  0  0  0  0  0
    4.0798    2.0274   -1.1889 Br  0  0  0  0  0  0  0  0  0  0  0  0
   -0.9519    2.1963   -1.5870 Br  0  0  0  0  0  0  0  0  0  0  0  0
   -0.1560   -0.1587   -2.3979 O   0  0  0  0  0  0  0  0  0  0  0  0
    0.8498   -2.0047   -1.2175 C   0  0  0  0  0  0  0  0  0  0  0  0
    0.7355   -0.4785    1.1330 O   0  0  0  0  0  0  0  0  0  0  0  0
    1.6040   -2.4625   -2.3959 C   0  0  0  0  0  0  0  0  0  0  0  0
    2.1860   -2.8158   -3.3052 N   0  0  0  0  0  0  0  0  0  0  0  0
  1  2  1  0      
  2  3  1  0      
  3  4  1  0      
  4  5  2  0      
  5  6  1  0      
  6  1  1  0      
  6  7  2  0      
  5  8  1  0      
  1  9  1  0      
  3 10  1  0      
  3 11  1  0      
  2 12  1  0      
 11 13  1  0      
 13 14  3  0      
M  STY  1   1 SUP
M  SLB  1   1   1
M  SAL   1  2  13  14
M  SBL   1  1  13
M  SMT   1 CN
M  SBV   1 13   -6.5682    2.9997
M  END
$$$$
