# Supplementary material for: Towards the Small and the Beautiful: A Small Dibromotyrosine Derivative from Pseudoceratina sp. Sponge Exhibits Potent Apoptotic Effect through Targeting IKK/NFκB Signaling Pathway
Source: MDPI journal article supplement (doi:10.3390/md11093168), 2013-08-26
Supplement: s3 [file s3]

marinedrugs-11-03168-s001.mol
  ChemDraw11271322412D

 14 14  0  0  0  0  0  0  0  0999 V2000
   -0.7145    0.7040    0.0000 C   0  0  0  0  0  0  0  0  0  0  0  0
   -0.7145   -0.1210    0.0000 C   0  0  0  0  0  0  0  0  0  0  0  0
   -0.0000   -0.5335    0.0000 C   0  0  0  0  0  0  0  0  0  0  0  0
    0.7145   -0.1210    0.0000 C   0  0  0  0  0  0  0  0  0  0  0  0
    0.7145    0.7040    0.0000 C   0  0  0  0  0  0  0  0  0  0  0  0
   -0.0000    1.1165    0.0000 C   0  0  0  0  0  0  0  0  0  0  0  0
   -0.0000    1.9415    0.0000 O   0  0  0  0  0  0  0  0  0  0  0  0
    1.4289    1.1165    0.0000 Br  0  0  0  0  0  0  0  0  0  0  0  0
   -1.4289    1.1165    0.0000 Br  0  0  0  0  0  0  0  0  0  0  0  0
   -0.5834   -1.1169    0.0000 O   0  0  0  0  0  0  0  0  0  0  0  0
    0.5834   -1.1169    0.0000 C   0  0  0  0  0  0  0  0  0  0  0  0
   -1.2978   -0.7044    0.0000 O   0  0  0  0  0  0  0  0  0  0  0  0
    0.5826   -1.9415    0.0000 C   0  0  0  0  0  0  0  0  0  0  0  0
    1.4076   -1.9415    0.0000 N   0  0  0  0  0  0  0  0  0  0  0  0
  1  2  1  0      
  2  3  1  0      
  3  4  1  0      
  4  5  2  0      
  5  6  1  0      
  6  1  1  0      
  6  7  2  0      
  5  8  1  0      
  1  9  1  6      
  3 10  1  6      
  3 11  1  1      
  2 12  1  1      
 11 13  1  0      
 13 14  3  0      
M  STY  1   1 SUP
M  SLB  1   1   1
M  SAL   1  2  13  14
M  SBL   1  1  13
M  SMT   1 CN
M  SBV   1 13   -6.5682    2.9997
M  END
